# Supplementary material
Source: PubMed Central journal article supplement (PMC4069212)
Supplement: 10-1055-s-0034-1368538-sup_gf797.pdf [file 10-1055-s-0034-1368538-sup_gf797.pdf]

# Elektrochemotherapie beim Mammakarzinom: eine Literaturübersicht

## Electrochemotherapy in Breast Cancer: A Review of References

**Autoren** G. Schmidt, I. Juhasz-Böss, E.-F. Solomayer, D. Herr

**Institut** Uniklinik Homburg, Homburg

### Schlüsselwörter

- Mammakarzinom
- Metastasierung
- Mamma

### Key words

- breast cancer
- metastasis
- mammary

### Zusammenfassung

Die Elektrochemotherapie ist eine neue Methode zur lokalen Behandlung von kutanen und subkutanen Metastasen. Sind Operation und/oder Radiatio nicht mehr möglich, so kann diese innovative Technik effektiv zur lokalen Tumorkontrolle eingesetzt werden. Die geringen Nebenwirkungen der Therapie und die geringe intraoperative Behandlungsdauer machen eine kurze Hospitalisation möglich. Durch wiederholten Einsatz der Elektrochemotherapie kann dabei die Rate an Komplettremissionen erhöht werden, sodass 2013 diese aus einem niedrig dosiertem Zytostatikum und Elektroporation bestehende Therapieform auch in die Mamma-Leitlinien der AGO/DKG aufgenommen wurde. Die günstige Kosten-Nutzen-Relation macht dieses Behandlungsverfahren in der klinischen Praxis sehr interessant, sodass es bereits erfolgreich in zahlreichen deutschen Kliniken eingesetzt wird.

### Abstract

Electrochemotherapy is a new method for the local treatment of cutaneous and subcutaneous metastases. If surgery and/or radiotherapy are no longer possible, this innovative technology can be used effectively for local tumour control. The minor side effects of the therapy and the low intraoperative duration of treatment make it possible to admit patients to hospital for just a short time. Thus, the repeated use of electrochemotherapy has allowed for an increase in the rate of complete remissions. In fact, in 2013, this form of treatment, which consists of a low-dose cytostatic and electroporation, was also included in the mammary guidelines of the Working Group for Gynaecological Oncology (AGO) and the German Cancer Society (DKG). The favourable cost-benefit ratio makes this method of treatment very interesting in clinical practice and, as a result, it is already being used successfully in many German hospitals.

### Grundlagen und technische Voraussetzungen der Elektrochemotherapie

Die Elektrochemotherapie ist eine Kombination aus Elektroporation und niedrig dosierter Chemotherapie. Die ersten klinischen (Phase I/II) Studien wurden dabei bereits zu Beginn der 1990er-Jahre durchgeführt [1]. Bisher konnte sich diese innovative Technologie v.a. im dermatologischen Bereich etablieren. Neue Studienergebnisse jedoch konnten auch eine gute Effektivität bei gynäkologischen Tumoren belegen, sodass die Elektrochemotherapie nun auch vermehrt im gynäkologischen Bereich eingesetzt wird.

Die Elektrochemotherapie nutzt das Phänomen der Elektroporation. Durch Anlegen eines äußeren elektrischen Feldes kann das Membranpotential der Zelle verändert werden. Bei ausreichend

hoher Intensität kommt es dabei zu Veränderungen der Membranstruktur. Dies kann kleine „Poren“ in der Membran verursachen, was wiederum die Membran für ansonsten nicht permeable Moleküle durchlässig macht. Durch die gesteigerte Permeabilität können auf diese Weise Zytostatika die Zellmembran passieren und dann durch Diffusion ins Zytoplasma gelangen. Die erhöhte Durchlässigkeit erlaubt auch, dass das Zytostatikum so in viel höherer Konzentration ins Zytoplasma gelangt, was zu einer verstärkten Zytotoxizität führt [2]. Da die Elektroporation auf das tumorbehaftete Areal begrenzt ist, gibt es keine gesteigerte systemische Toxizität durch das Chemotherapeutikum, was zur guten Verträglichkeit dieser Methode führt. Die Durchlässigkeit der Zellmembran ist jedoch nicht unbegrenzt möglich, sondern sistiert

**eingereicht** 23.2.2014  
**revidiert** 24.3.2014  
**akzeptiert** 25.4.2014

### Bibliografie

**DOI** <http://dx.doi.org/10.1055/s-0034-1368538>  
 Geburtsh Frauenheilk 2014; 74: 1–7 © Georg Thieme Verlag KG  
 Stuttgart · New York ·  
 ISSN 0016-5751

### Korrespondenzadresse

**Dr. Gilda Schmidt**  
 Uniklinik Homburg  
 Kirrbergerstraße 100  
 66421 Homburg  
 gilda.schmidt@uks.eu

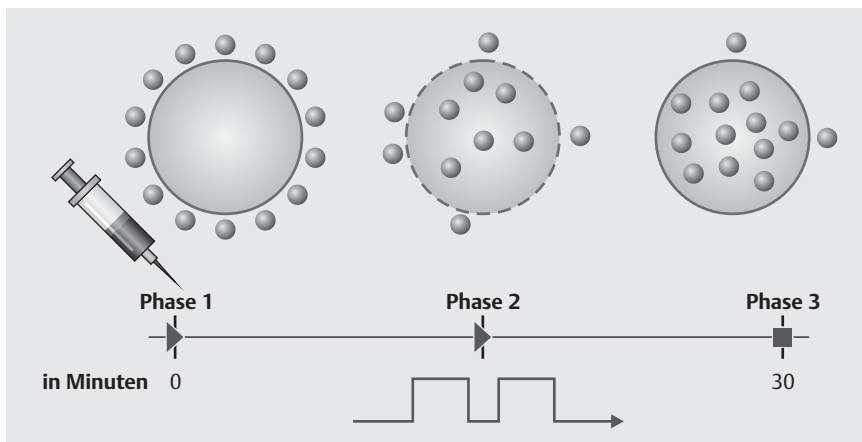

**Abb. 1** Schematische Darstellung der Elektrochemotherapie: Phase 1: Injektion des Zytostatikums: Bleomycin (i. v./intratumoral) oder Cisplatin (intratumoral); Phase 2: hochfrequente Elektroporation, führt zu einer permeablen Zellmembran und das Zytostatikum gelangt in bis zu 10000-fach höherer Konzentration in die Tumorzelle. Phase 3: reversible Poration, Zellmembran schließt sich und das Zytostatikum kumuliert in der Tumorzelle (mit freundlicher Genehmigung der Firma IGEA, Carpi, Italien).

bereits wieder wenige Minuten nach dem elektrischen Impuls (Abb. 1) [3].

### Praktische Durchführung und technische Voraussetzungen

Die Durchführung der Elektrochemotherapie erfolgt mithilfe eines elektrischen Impulsgebers, dem Cliniporator™ (IGEA, Carpi, Italien). Das Gerät ist in Abb. 1 dargestellt und besteht aus einer Konsoleneinheit, einem Netzteil zur Stromversorgung und einem Applikator zum Aufsetzen auf die Haut. Der Cliniporator™ ermöglicht die Elektroporation durch das Generieren eines elektrischen Niedrig- und eines Hochspannungsimpulses, welche über spezielle Elektroden in die Tumorzellen appliziert werden. Dadurch wird der intrazelluläre Transfer für Substanzen oder Moleküle, die normal die Zellmembran nicht passieren können, möglich. Der abgegebene Impuls dauert 100 µs. Die Anzahl der Impulse variiert zwischen 1–20 und deren Amplitude zwischen 100–1000 Volt. Die verwendete Frequenz liegt zwischen 1–5000 Hz. Während der Durchführung werden sowohl die applizierte Spannung als auch die entsprechende Stromkurve in Realtime auf dem Display dargestellt und erlauben somit eine Überwachung der Effektivität jeder einzelnen Elektroporation am Monitor.

Vor Beginn der Impulsgenerierung wird ein niedrig dosiertes Zytostatikum, in der Regel Bleomycin, mit einer Dosierung von 15 mg/m<sup>2</sup> Körperoberfläche über eine Minute intravenös verabreicht. Nach einem empfohlenen zeitlichen Abstand von 8 Minuten beginnt man mit der Verabreichung von elektrischen Impulsen. Mittels spezieller Elektroden wird ein elektrisches Feld um den Tumor erzeugt, die Zellmembran öffnet sich und das Zytostatikum kann in einer hohen Konzentration in der Zelle kumulieren. Je nach Größe, Tiefe und Form des Tumors werden unterschiedliche Nadelelektroden und Plattenelektroden verwendet (Abb. 2) [3]. Abhängig von der Lokalisation wird der Eingriff in Lokalanästhesie, Regionalanästhesie oder Allgemeinanästhesie durchgeführt. Bei großen Flächen ist mit einer schmerzhaften Kontraktion der Muskulatur zu rechnen, daher ist es sinnvoll, den Eingriff in Allgemeinanästhesie durchzuführen. Die besten Ergebnisse erzielt man, wenn die Impulsapplikation innerhalb von 25 Minuten nach Gabe des Chemotherapeutikums erfolgt [3–5].

### Verwendete Zytostatika

Verschiedene Zytostatika wurden bisher in präklinischen Studien getestet (z.B. Doxorubicin, Daunorubicin, Paclitaxel, Etoposid, Bleomycin und Cisplatin etc.). Grundsätzlich ist die antitumorale Wirkung nach Elektroporation für Cisplatin vom 1,1- bis zum 80-Fachen erhöht und für Bleomycin mehrere tausendfach [6]. Basierend auf diesen Studien erwiesen sich Bleomycin und Cisplatin in ihrer Wirkung als die optimalen Substanzen [6]. Die Verabreichung der Zytostatika kann dabei sowohl intravenös als auch intratumoral erfolgen [3]. Hinsichtlich der Ansprechraten gibt es bei Gabe von Cisplatin und von Bleomycin keinen signifikanten Unterschied zwischen der intratumoralen und intravenösen Verabreichung (Abb. 3).

### Bleomycin

Bleomycin ist ein antitumorös wirkendes Antibiotikum aus der Gruppe der Glykopeptide mit minimaler myelotoxischer Wirkung [7]. Wichtig bei Bleomycin ist, dass es primär renal ausgeschieden wird und dass es durch das Enzym Bleomycin-Hydrolase inaktiviert wird. Dieses Enzym kommt in allen Zellen des menschlichen Körpers vor, jedoch ist die Konzentration des Enzyms in Hautzellen und in den alveolären Epithelzellen der Lunge erniedrigt.

Die Verabreichung des Bleomycins kann subakute oder chronisch verlaufende interstitielle plasmazelluläre Pneumonien hervorrufen, die im schlimmsten Fall auch zu einer interstitiellen Fibrose führen können. Eine pulmonale Toxizität wird bei ca. 10% der Patienten beschrieben, und bei ca. 1% der Patienten entwickelt sich aus der durch Bleomycin hervorgerufenen nichtspezifischen Pneumonitis eine Lungenfibrose, die im schlimmsten Fall auch zum Tod führt [8]. Risikofaktoren, die eine Lungenfibrose begünstigen, sind hohes Lebensalter, Lungenvorerkrankungen, Nikotinabusus, Niereninsuffizienz, vorausgegangene Strahlentherapie der Lunge, erhöhte Sauerstoffkonzentration in der Einatemluft, usw. [9] (Bleomycin-Fachinformation).

Ein Zusammenhang zwischen Bleomycin-Dosis und pulmonaler Toxizität konnte bereits nachgewiesen werden. Daher sollte die Bleomycin-Dosis von 400 IU/m<sup>2</sup> nicht überschritten werden.

Weiterhin wichtig ist, dass 2/3 der verabreichten Bleomycin-Dosis unverändert im Urin ausgeschieden wird. Schlussfolgernd haben Patienten mit Nierenfunktionsstörungen eine stark erhöhte Plasmakonzentration, wenn übliche Dosen verabreicht werden. Daher sollten Patienten mit mäßig eingeschränkter Nierenfunktion (glomerulären Filtrationsrate [GFR] 10–50 ml/Minute) nur 75%

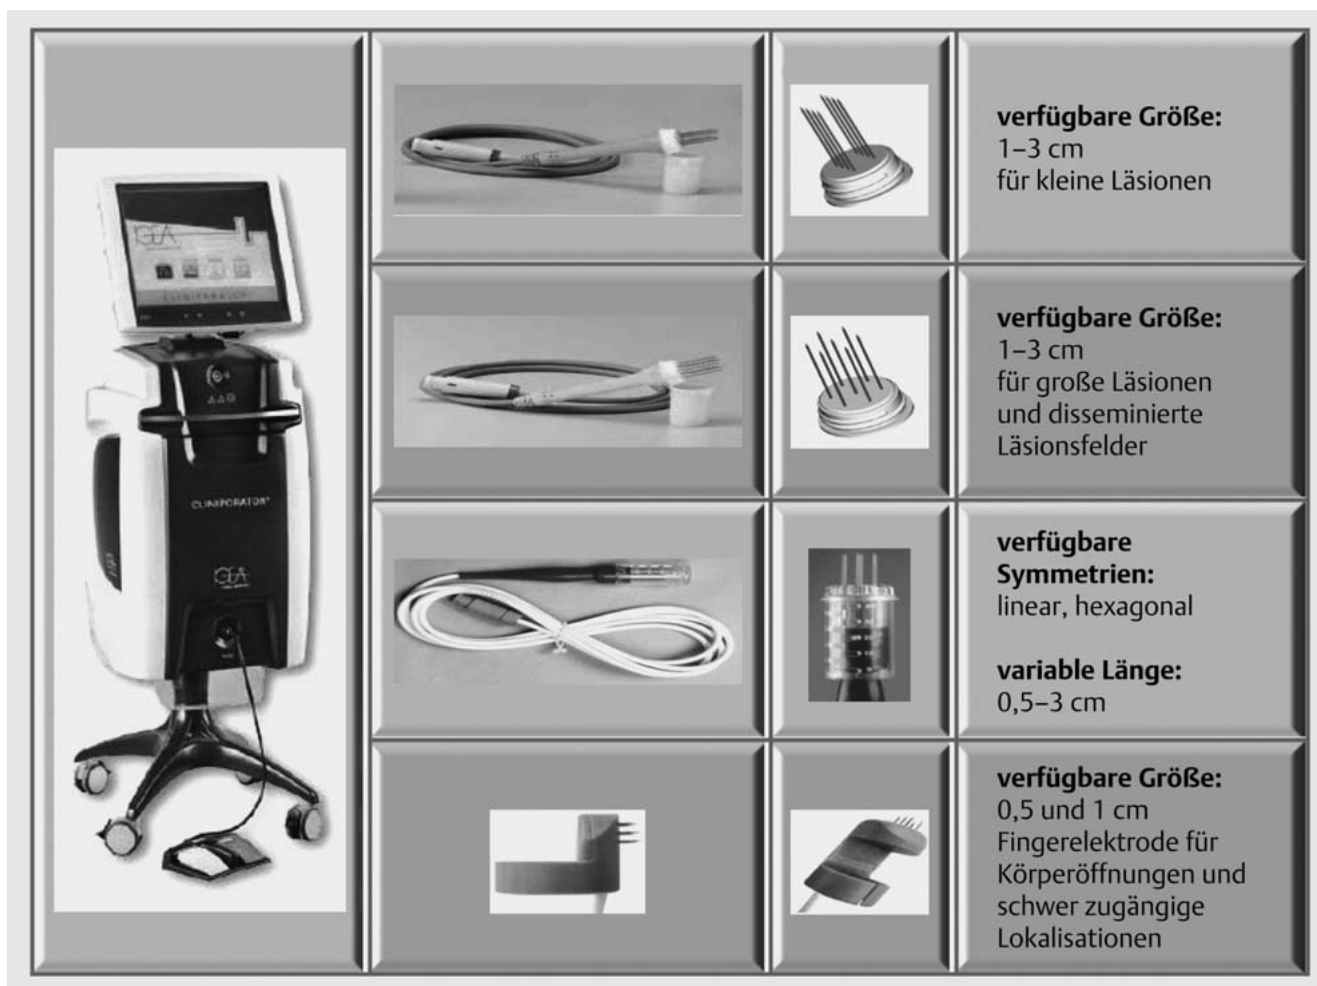

**Abb. 2** Cliniporator und Elektroden zur Durchführung der Elektrochemotherapie (mit freundlicher Genehmigung der Firma IGEA, Carpi, Italien).

der üblichen Dosis erhalten, bei einem normalen Dosisintervall, während Patienten mit schwerer Nierenfunktionsstörung (GFR < 10 ml/Minute) 50% der üblichen Dosis erhalten sollten, bei einem normalen Dosisintervall. Keine Dosisanpassung ist nötig bei Patienten mit einer GFR > 50 ml/Minute (Bleomycin-Fachinformation).

Bei einer Überdosierung kann es zu Hypotonie, Fieber, Pulszunahme, Atembeschwerden und generellen Schocksymptomen kommen. Wichtig ist, dass es kein spezielles Antidot gibt und dass Bleomycin auch nicht dialysiert werden kann.

Bei respiratorischen Schwierigkeiten sollte der Patient mit Kortikosteroiden und Breitbandantibiotika behandelt werden.

Wie wirkt nun Bleomycin auf Zellebene?

Bleomycin führt auf DNA-Ebene zu DNA-Strangbrüchen und hemmt die DNA-abhängige Polymerase. Dadurch kommt es zur Fragmentierung der DNA [10].

Die Wirkung des Bleomycins bleibt trotz Elektroporation unverändert: durch DNA-Brüche wird der Zelltod induziert, ähnlich

wie bei Diffusion durch nicht permeable Membranen. Bei nicht elektroporierten Zellen ist die Aufnahme von Bleomycin beschränkt.

Bei der Elektrochemotherapie ist sowohl eine intratumorale als auch die intravenöse Bleomycin-Applikation möglich. Die intratumorale Verabreichung ist dann zu empfehlen, wenn wenige Metastasen (< 7) und kleine Knötchen (< 20 mm im Durchmesser) vorhanden sind [3,6,11,12]. Die Dosierung bei der intratumoralen Gabe ist abhängig vom Tumolvolumen. In **Tab. 1** sind die entsprechenden Dosierungen aus der SOP dargestellt. Die Anzahl der zu behandelnden Metastasen muss natürlich vorher bestimmt werden.

Studien konnten zeigen, dass das Ansprechen der kutanen Metastasen bei alleiniger Gabe von Bleomycin intratumoral deutlich schlechter ist (31%) als das Ansprechen bei Verabreichung der Kombination aus Bleomycin intratumoral und der Elektroporation (78%) [12] (**Abb. 4**).

**Tab. 1** Dosierung von Bleomycin intratumoral und Cisplatin intratumoral entsprechend des Tumolvolumens (Mir et al. 2006).

| Tumolvolumen ( $V = ab^2\pi/6$ )          | < 0,5 cm <sup>3</sup>                      | 0,5–1 cm <sup>3</sup>                   | > 1 cm <sup>3</sup>                      |
|-------------------------------------------|--------------------------------------------|-----------------------------------------|------------------------------------------|
| Bleomycin-Dosis Konzentration 1 000 IU/ml | 1 ml (1 000 IU)/cm <sup>3</sup> des Tumors | 0,5 (500 IU)/cm <sup>3</sup> des Tumors | 0,25 (250 IU)/cm <sup>3</sup> des Tumors |
| Carboplatin-Dosis Konzentration 2 mg/ml   | 1 ml (2 mg)/cm <sup>3</sup> des Tumors     | 0,5 (1 mg)/cm <sup>3</sup> des Tumors   | 0,25 (0,5 mg)/cm <sup>3</sup> des Tumors |

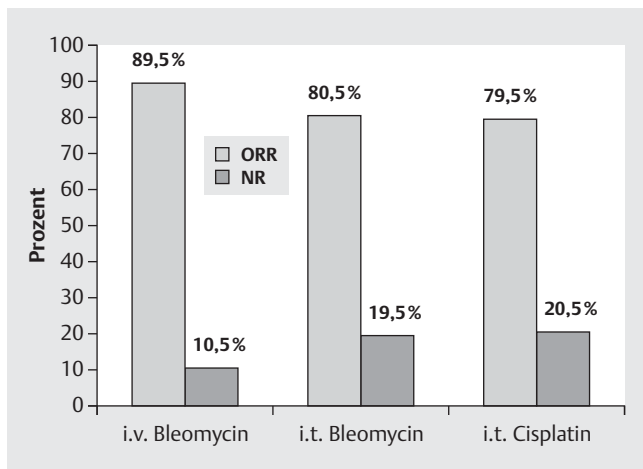

**Abb. 3** Objektive Ansprechrate von Tumoren, behandelt mit Bleomycin intravenös oder intratumoral (i. v. oder i. t.) und Cisplatin intratumoral (i. t.). ORR: „overall response“, NR: „no response“ (mit freundl. Genehmigung der Firma IGEA, Carpi, Italien).

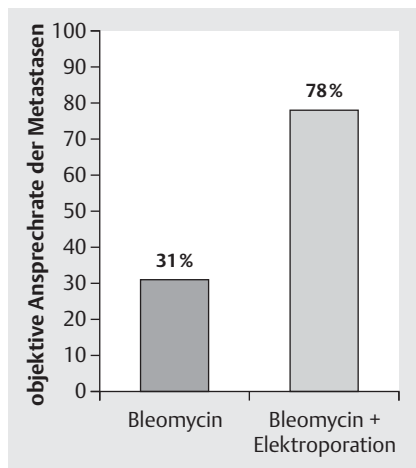

**Abb. 4** Ansprechrate der kutanen Metastasen bei alleiniger Bleomycin-Therapie intratumoral vs. Kombinationstherapie Bleomycin intratumoral und der gleichzeitigen Elektroporation (mit freundl. Genehmigung der Firma IGEA, Carpi, Italien).

Sind mehrere, größere Metastasen (> 20 mm im Durchmesser) vorhanden, dann ist die intravenöse Gabe von Bleomycin zu empfehlen. Die Dosierung von Bleomycin sollte in diesem Fall 15 mg/m<sup>2</sup> oder 18–27 IU/m<sup>2</sup> betragen. Für die intravenöse Applikation sollte es in 5 bzw. 10 ml (max. 50 ml) gelöst sein, damit es innerhalb von einer Minute verabreicht werden kann. Die Dosierung ist vergleichbar mit der konventionellen Chemotherapie; dadurch dass sie jedoch nur einmal erfolgen muss, ist die Gesamtdosis insgesamt als niedrig anzusehen. Die Elektrochemotherapie-Behandlung kann aber auch, wenn nötig, mehrmals wiederholt werden. Die kumulative Bleomycin-Dosis von 400 IU/m<sup>2</sup> darf jedoch wegen der Gefahr der Lungenfibrose nicht überschritten werden. Wichtig ist auch wegen des erhöhten Lungenfibrosierisikos bei Hyperoxie, dass bei einer Analgosedierung oder Allgemeinanästhesie die FiO<sub>2</sub> vom Anästhesisten möglichst niedrig gewählt wird.

In der Praxis hat sich die intravenöse Gabe von Bleomycin bewährt und die nicht intratumorale.

## Cisplatin

Cisplatin wirkt genauso wie Bleomycin auf DNA-Ebene. Aber anders als Bleomycin führt es zu Quervernetzungen der DNA, zerstört so ihre Struktur und macht sie dadurch funktionsunfähig. Die Folge ist, dass die Zelle im Anschluss Apoptose einleitet.

Ausgeschieden wird Cisplatin zu 90% renal (tubulär und glomerulär). Vor Therapiebeginn und während der Therapie sollten Nierenfunktion, Elektrolyte, Blutbild, Gehör sowie Leber und neurologische Funktionen untersucht werden. Zur Vermeidung von schweren Nierenschädigungen sollte auf eine ausreichende Flüssigkeitszufuhr geachtet werden. Eine forcierte Diurese darf auf keinen Fall mit Schleifendiuretika durchgeführt werden, da die Gefahr der Nierentubulusschädigung und einer gesteigerten Ototoxizität erhöht wird. Sollte eine forcierte Flüssigkeitsretention nötig sein – z. B. bei einer Flüssigkeitsretention ≥ 1000 ml –, muss Mannitol gegeben werden.

Zwei Stunden nach der Anwendung ist Cisplatin zu über 90% an Plasmaproteine gebunden. Daher ist Cisplatin nur in den ersten 2 Stunden nach der Anwendung dialysierbar (Cisplatin-Fachinformation).

Cisplatin darf im Rahmen einer intravenösen Chemotherapie je nach Therapieschema in Dosen bis zu 100 mg/m<sup>2</sup> KOF verabreicht werden. Diese hohen Dosen werden im Rahmen der Elektrochemotherapie nicht erreicht, dadurch, dass es im Gegensatz zu Bleomycin nur intratumoral und nicht intravenös verabreicht werden darf. Daher sind auch die zu erwartenden Nebenwirkungen unter Elektrochemotherapie als gering einzustufen (Tab. 1).

Cisplatin sollte auch nur bei wenigen (< 7), kleineren (< 20 mm im Durchmesser) Metastasen angewandt werden. Die Dosierung ist in Tab. 1 dargestellt. Auch bei Cisplatin muss die Anzahl der zu behandelnden Metastasen vorher bestimmt werden.

## Studienlage zur Indikation

### Allgemein

Die Methode ist geeignet für Patienten mit kutanen oder subkutanen Metastasen, die bereits die Möglichkeit der Operation und Strahlentherapie ausgeschöpft haben und operativ oder chemotherapeutisch nicht mehr aussichtsreich behandelt werden können. Die Methode ist dabei grundsätzlich für alle soliden Tumoren geeignet. Der Einsatz ist palliativ mit den Zielen der tumorassoziierten Symptomlinderung und Verbesserung der Lebensqualität. Diese werden durch kurze Behandlungsdauer, der raschen Wirkung der Elektrochemotherapie und der einfachen Nachbehandlung gewährleistet.

2003 wurde das ESOPE-Projekt (European Standard Operating Procedures for Electrochemotherapy) [3] gegründet. Ziel dieses Projekts war es, im Rahmen einer internationalen, multizentrischen und prospektiven Studie die Wirksamkeit der Elektrochemotherapie bei kutanen und subkutanen Metastasen zu bestätigen und eine Standardisierung der Methode zu entwickeln. Endpunkte der Studie waren Ansprechrate nach WHO-Kriterien, Ansprechrate unter Berücksichtigung der Tumorart, Größe, Lokalisation usw. Weiterhin sollten im Rahmen des Projekts auch die Nebenwirkungen und die Toxizität der Therapie untersucht werden. Insgesamt wurden 41 Patienten mit kutanen und subkutanen Metastasen, deren Tumorgöße < 3 cm war, eingeschleust. Die Studie zeigte, dass die Elektrochemotherapie sowohl bei Melanomen als auch bei Nichtmelanomen effektiv war mit einer Komplettremissionsrate von 74%, einer Partiellemissionsrate

von 11% entsprechend den WHO-Kriterien. Die lokale Tumorkontrollrate 5 Monate nach der Behandlung betrug zwischen 73–88% [3, 13]. Eine weitere, 2008 veröffentlichte Studie mit 52 Patienten und unterschiedlichen Tumortypen zeigte, dass 1 Monat nach der Elektrochemotherapiebehandlung 50% der Patienten eine Komplettremission hatten. Eine partielle Remission war bei 46% der Patienten und kein Ansprechen bei 4% feststellbar. Das Ansprechen wurde entsprechend den RECIST-Kriterien objektiviert. Bezüglich der Lebensqualität gaben in dieser Arbeit 94% der befragten Patienten eine Besserung nach durchgeführter Elektrochemotherapie an [14]. Eine weitere dänische und englische Arbeit mit 52 Patienten zeigte eine Komplettremissionsrate von 68% und eine Partiellemissionsrate von 18% für kutane Metastasen < 3 cm und entsprechend 8 und 23% für Metastasen > 3 cm [15].

Mali et al. veröffentlichten 2012 eine Übersichtsarbeit, die den Effekt der Elektrochemotherapie weiter festigen sollte. Insgesamt wurden 44 bereits veröffentlichte Studien (1993–2011) mit 413 Patienten und 1894 Tumoren analysiert. Sowohl Patienten mit malignen Melanomen, Brustkrebs als auch mit Kopf- und Halstumoren wurden untersucht. Festzustellen war, dass die Elektrochemotherapie unabhängig vom Tumortyp eine Komplettremissionsrate von 59,4% und eine objektive Ansprechrate von 84,1% aufzeigte [16].

### Mammakarzinom

Beim Mammakarzinom sind Rezidive im Bereich der Thoraxwand nach Mastektomie mit einer Inzidenz von 5–40% beschrieben worden [17–19]. Bekannt ist auch, dass ca. 10–15% aller Brustkrebspatientinnen nach Mastektomie und Radiotherapie innerhalb von 10 Jahren ein lokoregionäres Rezidiv entwickeln. Bei den meisten Patientinnen treten diese sogar bereits nach 2–3 Jahren [20–22] in Form von zahlreichen kutanen und subkutanen Knötchen im Bereich der Thoraxwand auf. Bleiben diese unbehandelt, führen sie häufig zu Ulzerationen, Blutungen, Schmerzen usw. Die Lebensqualität der betroffenen Patientinnen wird dadurch deutlich eingeschränkt.

Wurden die Therapiemöglichkeiten der Operation und der Strahlentherapie bereits ausgeschöpft, so sind die Möglichkeiten der lokalen Tumorkontrolle begrenzt. Sprechen die kutanen Metastasen nicht gut auf die Chemotherapie an, so bleiben nur Miltefosin oder die Elektrochemotherapie als weitere Optionen. Die topische Chemotherapie mit Miltefosin war eine Möglichkeit, denn dieses Mittel wurde aus dem Handel gezogen und ist in Deutschland nicht mehr verfügbar. Weiterhin zeigten Studien auch nur einen mäßigen Erfolg dieses Präparats bei kutanen Metastasen. Die gesamte Ansprechrate ist für Miltefosin lediglich 33%. Die topische Chemotherapie ist auch nicht nebenwirkungsarm, denn bei mehr als 1/3 der behandelten Patienten tritt unter der Therapie eine schwere toxische Hautreaktion Grad 3 oder Grad 4 auf [23]. Daher ist gerade für solchermaßen austherapierte Patientinnen die Elektrochemotherapie, als eine nebenwirkungsarme Option, eine geeignete Therapie.

Die bisher veröffentlichten Arbeiten sind dabei sehr vielversprechend: in einer 2012 veröffentlichten Phase-II-Studie hatten 2 Monate nach der Elektrochemotherapie 19 von 35 Patientinnen (54,3%) mit einem nicht resektablen Brustwandrezidiv eine Komplettremission, 13 Patientinnen (37,1%) eine partielle Remission und 3 Patientinnen (8,6%) kein Ansprechen. Die Elektrochemotherapie wurde in dieser Arbeit im Durchschnitt 2-mal durchgeführt. Mittels dieser Methode konnte eine Tumorkontrollrate von 81% über den Beobachtungszeitraum von 3 Jahren

erreicht werden [24]. In einer weiteren Phase-II-Studie mit 12 Patientinnen sind die Daten etwas nüchterner. Diese Studie zeigte eine Komplettremissions- und partielle Remissionsrate von jeweils 8%. Die Einstufung Stable Disease war jedoch bei 75% der Patientinnen festzustellen und ein Progress bei 8% [25]. Die 2012 veröffentlichte Benevento-Studie mit 12 älteren Patienten (mittleres Alter 76, 11 Frauen, 1 Mann) zeigt deutlich bessere Ansprechraten: mittels Elektrochemotherapie konnte eine Komplettremissionsrate der Metastasen von 75,3% und eine partielle Remissionsrate von 17% erreicht werden [4].

2011 wurde von Sersa et al. eine Übersichtsarbeit veröffentlicht, die das Ansprechen der Elektrochemotherapie beim Thoraxwandrezidiv des Mammakarzinoms untersuchte. Insgesamt 8 Arbeiten wurden analysiert. Festzustellen war, dass die Ansprechrate 89% betrug und die Komplettremissionsrate 59% [26]. Diese Ergebnisse sind ermutigend, wenn man bedenkt, dass die Behandlung in verschiedenen Zentren erfolgte und Tumoren unterschiedlicher Größe und Ausdehnung damit behandelt wurden [26].

### Zusammenfassung der Vor- und Nachteile der Elektrochemotherapie

#### ▼ Vorteile

Die Methode ist für Patienten mit ausgeprägter Komorbidität und/oder hohem Alter geeignet, die jegliche Behandlungen bereits ausgeschöpft haben. Mittels Elektrochemotherapie können schmerzende, blutende und nässende Metastasen sowie großflächige Läsionen bis zu einer Tiefe von 4 cm behandelt werden. Weiterhin kann die Durchführung der Elektrochemotherapie auch zur Vermeidung von großen Vernarbungen und evtl auch zur Funktionserhaltung z. B. des Armes bei starkem Lymphödem führen. Insgesamt gewinnen die Patienten durch diesen Eingriff an Lebensqualität. Der Eingriff ist mit einer kurzen Hospitalisation von 2–3 Tagen vergesellschaftet. Die Nebenwirkungen sind gering, die meisten Patientinnen brauchen keine Analgetika. Meistens ist im Bereich der behandelten Thoraxwand lediglich eine vorübergehende Rötung der Haut sichtbar und die Einstichstellen der Elektroden. Muskelfaszikulationen im Sinne eines Muskelkaters sind eher selten.

Mithilfe der Elektrochemotherapie ist eine lokale Tumorkontrolle möglich. Weiterhin ist eine Wiederholbarkeit möglich im Gegensatz zur Radiotherapie zum Beispiel.

Die günstige Kosten-Nutzen-Relation macht dieses Verfahren attraktiv.

#### Nachteile

Der Eingriff wird in Vollnarkose durchgeführt, und ist mit den allgemeinen Narkoserisiken vergesellschaftet. Durch den Einsatz von Bleomycin intravenös ist die Entwicklung einer Lungenfibrose möglich, gerade weil es sich um Patienten handelt, die bereits bestrahlt wurden, morbide, älter etc sind. Daher sollte vor dem Eingriff ein Lungenfunktionstest durchgeführt werden. Während der Narkose sollte vom Anästhesisten ein möglichst niedriges FiO<sub>2</sub> gewählt werden, um das Risiko einer Lungenfibrose zu minimieren. Die Elektrode, die während der Elektrochemotherapie benutzt wird, ist ein nicht ganz billiges Einmalinstrument. Gerade bei großflächigem Einsatz der Elektrochemotherapie ist durch vermehrten Tumorzerfall auch die Entstehung von großen Ulzera möglich. Da der Einsatz der Elektrochemotherapie nicht kurativ, sondern palliativ ist, ist eine Wiederholung der Behandlung im

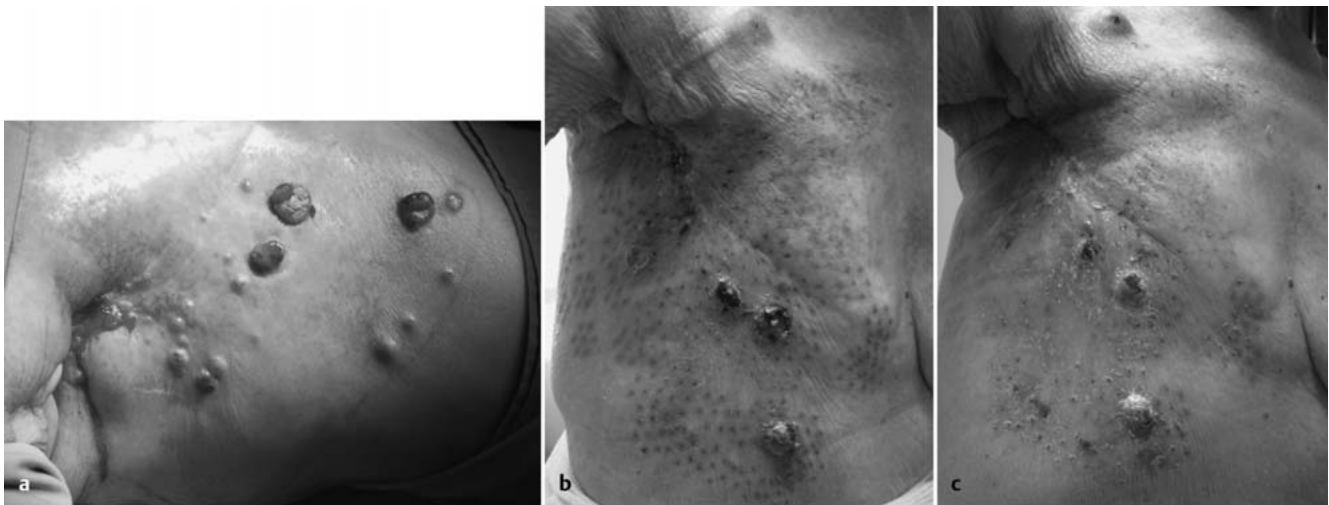

**Abb. 5a bis c** Ergebnis nach Elektrochemotherapie (eigene Erfahrungen). Patientin mit zahlreichen kutanen Metastasen des bekannten Mammakarzinoms im Bereich der Thoraxwand. Die Patientin klagte über Juckreiz, Schmerzen und Blutungen aus den oben gezeigten Metastasen. In **a** ist die Patientin vor der Chemotherapie dargestellt. Die Abbildung **b** zeigt die Pa-

tientin 1 Woche nach der Elektrochemotherapie. Man sieht deutlich, dass die ulzerierenden Metastasen z. T. nekrotisch geworden sind, und auch deutlich kleiner. Die Abbildung **c** zeigt die Patientin 4 Wochen nach dem Eingriff. Nach 4 Wochen haben sich die Metastasen weiter zurückgebildet.

Verlauf sehr wahrscheinlich, da die Metastasen nach einiger Zeit progredient werden.

### Eigene Erfahrungen

▼  
 ◉ **Abb. 5** zeigt eine 75-jährige Patientin mit kutanen Metastasen eines Mammakarzinoms im Bereich der Thoraxwand rechts, die massiv vorbehandelt ist. Die Läsionen sind seit 2009 bestehend, im Verlauf jedoch zunehmend. Die Patientin wurde bereits bestrahlt, eine weitere Radiatio ist nicht mehr möglich. Die Läsionen an der Thoraxwand sind nicht operabel und eine chemotherapeutische Option bei bereits 7 erhaltenen Chemotherapielinien besteht nicht mehr. Bei hohem Leidensdruck der Patientin, bedingt durch die Schmerzen, den Juckreiz und den Blutungen aus den ulzerierten Metastasen, wurde bei der Patientin eine Elektrochemotherapie durchgeführt. In ◉ **Abb. 5a** ist die Patientin präoperativ dargestellt. Die Ergebnisse 1 Woche und 1 Monat nach der Elektrochemotherapie sind in ◉ **Abb. 5b** und **c** dargestellt.

### Schlussfolgerung zur klinischen Praxis

▼  
 Die Elektrochemotherapie ist eine vielversprechende Methode zur Behandlung von kutanen und subkutanen Metastasen beim lokalen/lokoregionären Rezidiv eines Mammakarzinoms in der palliativen Situation.

Diese innovative Therapie verbessert die Lebensqualität der Patienten und trägt zur lokalen Tumorkontrolle bei. Die Nebenwirkungen sind je nach Ausmaß der behandelten Fläche gering. Sie bestehen aus einer Rötung im Bereich der behandelten Thoraxwand, die auch zu persistierenden Hautveränderungen (Hyperpigmentation der Haut) führen kann, und Muskelfaszikulationen in diesem Bereich.

### Interessenkonflikt

▼  
 Nein.

### Literatur

- 1 Mir LM, Belehradec M, Domenge C et al. [Electrochemotherapy, a new antitumor treatment: first clinical trial]. *C R Acad Sci III* 1991; 313: 613–618
- 2 Mir LM, Orlowski S, Belehradec J jr. et al. Electrochemotherapy potentiation of antitumor effect of bleomycin by local electric pulses. *Eur J Cancer* 1991; 27: 68–72
- 3 Lluís M, Gehl J, Sersa G et al. Standard operating procedures of the electrochemotherapy: instructions for the use of bleomycin or cisplatin administered either systemically or locally and electric pulses delivered by the Cliniporator™ by means of invasive or non-invasive electrodes. *EJC Supplements* 2006; 4: 14–25
- 4 Benevento R, Santoriello A, Perna G et al. Electrochemotherapy of cutaneous metastases from breast cancer in elderly patients: a preliminary report. *BMC Surg* 2012; 12 (Suppl. 1): S6
- 5 Grischke E-M, Wallwiener D, Souchon R et al. Isolated loco-regional recurrence of breast cancer – established and innovative therapy concepts. *Geburtsh Frauenheilk* 2013; 73: 611–622
- 6 Sersa G, Miklavcic D. Electrochemotherapy of tumours. *J Vis Exp* 2008; (22): pii: 1038
- 7 Umezawa H. Bleomycin and other antitumor antibiotics of high molecular weight. *Antimicrob Agents Chemother (Bethesda)* 1965; 5: 1079–1085
- 8 Ichikawa T. [A new anti-neoplastic agent, bleomycin–its effect on squamous cell carcinoma]. *Nihon Ishikai Zasshi* 1969; 61: 487–497
- 9 Schmidt-Matthiesen H, Bastert G, Wallwiener D, Hrsg. *Gynäkologische Onkologie: Diagnostik, Therapie und Nachsorge – auf der Basis der AGO-Leitlinien*. 7. Aufl. Stuttgart: Schattauer Verlag; 2002
- 10 Lüllmann H, Mohr K, Wehling M. *Pharmakologie und Toxikologie: Arzneimittelwirkungen verstehen – Medikamente gezielt einsetzen*. 15. Aufl. Stuttgart: Thieme; 2003: 476
- 11 Moller MG, Salva S, Soden DM et al. Electrochemotherapy as an adjunct or alternative to other treatments for unresectable or in-transit melanoma. *Expert Rev Anticancer Ther* 2009; 9: 1611–1630
- 12 Testori A, Tosti G, Martinoli C et al. Electrochemotherapy for cutaneous and subcutaneous tumor lesions: a novel therapeutic approach. *Dermatol Ther* 2010; 23: 651–661
- 13 Marty M, Sersa G, Garbay JR et al. Electrochemotherapy – An easy, highly effective and safe treatment of cutaneous and subcutaneous metastases: Results of ESOPE (European Standard Operating Procedures of Electrochemotherapy) study. *EJC Supplements* 2006; 4: 3–13

- 14 *Campana LG, Mocellin S, Basso M et al.* Bleomycin-based electrochemotherapy: clinical outcome from a single institution's experience with 52 patients. *Ann Surg Oncol* 2009; 16: 191–199
- 15 *Matthiessen LW, Chalmers RL, Sainsbury DC et al.* Management of cutaneous metastases using electrochemotherapy. *Acta Oncol* 2011; 50: 621–629
- 16 *Mali B, Jarm T, Snoj M et al.* Antitumor effectiveness of electrochemotherapy: a systematic review and meta-analysis. *Eur J Surg Oncol* 2013; 39: 4–16
- 17 *Spratt JS.* Locally recurrent cancer after radical mastectomy. *Cancer* 1967; 20: 1051–1053
- 18 *Valagussa P, Bonadonna G, Veronesi U.* Patterns of relapse and survival following radical mastectomy. Analysis of 716 consecutive patients. *Cancer* 1978; 41: 1170–1178
- 19 *Bedwinek J.* Natural history and management of isolated local-regional recurrence following mastectomy. *Semin Radiat Oncol* 1994; 4: 260–269
- 20 *Arriagada R, Le MG, Rochard F et al.* Conservative treatment versus mastectomy in early breast cancer: patterns of failure with 15 years of follow-up data. Institut Gustave-Roussy Breast Cancer Group. *J Clin Oncol* 1996; 14: 1558–1564
- 21 *Buchanan CL, Dorn PL, Fey J et al.* Locoregional recurrence after mastectomy: incidence and outcomes. *J Am Coll Surg* 2006; 203: 469–474
- 22 *van Tienhoven G, Voogd AC, Peterse JL et al.* Prognosis after treatment for loco-regional recurrence after mastectomy or breast conserving therapy in two randomised trials (EORTC 10801 and DBCG-82TM). EORTC Breast Cancer Cooperative Group and the Danish Breast Cancer Cooperative Group. *Eur J Cancer* 1999; 35: 32–38
- 23 *Leonard R, Hardy J, van Tienhoven G et al.* Randomized, double-blind, placebo-controlled, multicenter trial of 6% miltefosine solution, a topical chemotherapy in cutaneous metastases from breast cancer. *J Clin Oncol* 2001; 19: 4150–4159
- 24 *Campana LG, Valpione S, Falci C et al.* The activity and safety of electrochemotherapy in persistent chest wall recurrence from breast cancer after mastectomy: a phase-II study. *Breast Cancer Res Treat* 2012; 134: 1169–1178
- 25 *Matthiessen LW, Johannesen HH, Hendel HW et al.* Electrochemotherapy for large cutaneous recurrence of breast cancer: a phase II clinical trial. *Acta Oncol* 2012; 51: 713–721
- 26 *Sersa G, Cufer T, Paulin SM et al.* Electrochemotherapy of chest wall breast cancer recurrence. *Cancer Treat Rev* 2012; 38: 379–386
